# Supplementary material for: Adipose Tissue from Lean and Obese Mice Induces a Mesenchymal to Epithelial Transition-Like Effect in Triple Negative Breast Cancers Cells Grown in 3-Dimensional Culture
Source: MDPI journal article supplement (doi:10.3390/ijms21176439), 2020-09-03
Supplement: s1 [file s1]

# Adipose Tissue from Lean and Obese Mice Induces a Mesenchymal to Epithelial Transition-Like Effect in Triple Negative Breast Cancers Cells Grown in 3-Dimensional Culture

Emmanuel C. Asante, Nikitha K. Pallegar, Alica J. Hoffman Alicia M. Vilorio-Petit and Sherri L. Christian

Supplementary figures S1-S2

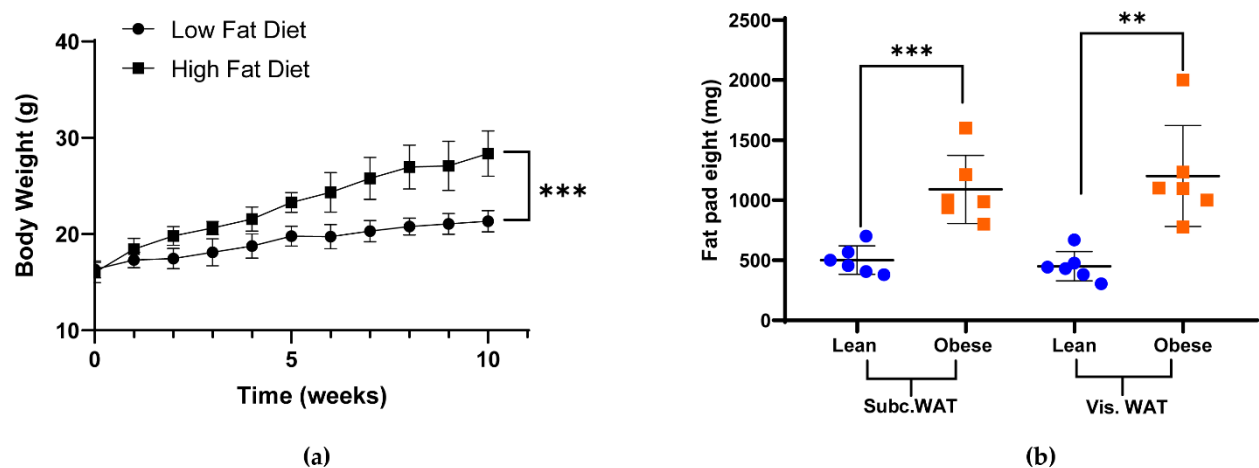

**Figure 1.** (a) Female C57BL/6N mice become obese after 10 weeks on high fat diet. Body weight of C57BL/6N mice fed low fat diet or high fat diet for 10 weeks. Values are means  $\pm$  SD.  $n = 6$ . Differences between means were determined by repeated measure one-way ANOVA,  $***p < 0.001$ . (b) Fat pad weight of lean and obese female C57BL/6N mice post-euthanization. Data points are mean  $\pm$  SD weight of the fat pads.  $n = 6$ . Differences between means were determined by Student's T-test,  $***p < 0.001$  and  $**p < 0.01$ .

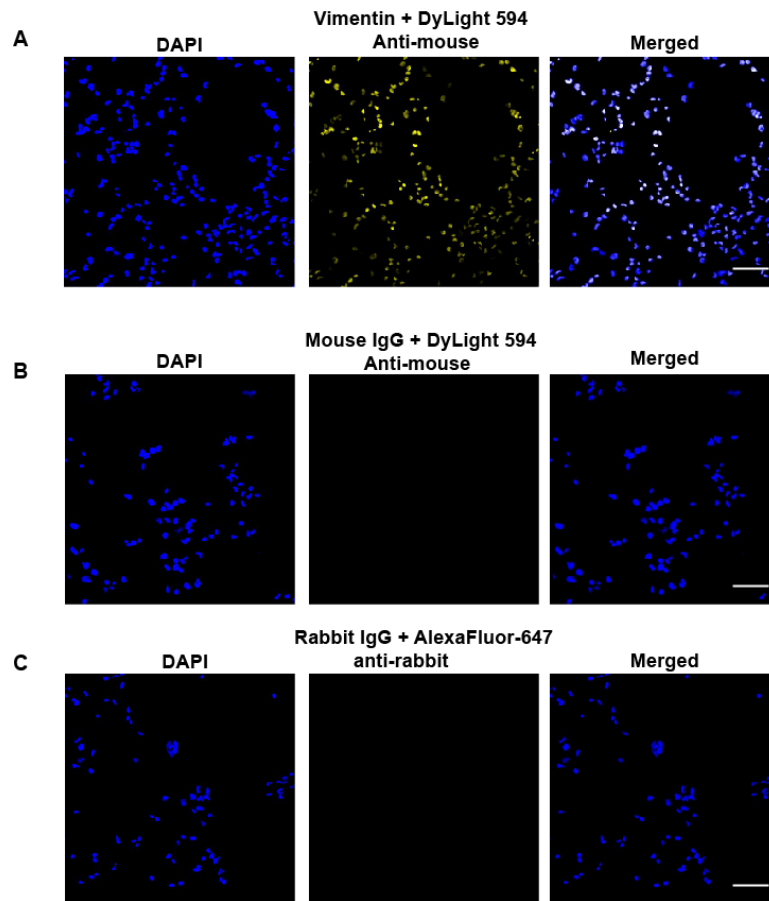

**Figure 2.** Signal due to non-specific antibody binding was not detected. Representative images of MDA-MB-231 cells stained with: **(A)** anti-vimentin followed by Dylight 594 anti-mouse. **(B)** mouse IgG isotype control followed by Dylight 594 anti-mouse. **(C)** rabbit IgG isotype control followed by Alexafluor 674 anti-rabbit (scale bar = 100  $\mu$ M).
